# Supplementary material for: XAS studies of Se speciation in selenite-fed rats
Source: Royal Society of Chemistry journal article supplement (doi:10.1039/c4mt00227j), 2014-01-01
Supplement: c4mt00227j1.pdf [file c4mt00227j1.pdf]

## Supporting Information

### XAS Studies of Se Speciation in Selenite-Fed Rats

Claire M. Weekley,<sup>†</sup> Jade B. Aitken,<sup>§</sup> Paul K. Witting,<sup>‡</sup> and Hugh H. Harris<sup>†,\*</sup>

<sup>†</sup>*School of Chemistry and Physics, The University of Adelaide, SA 5005, Australia*

<sup>§</sup>*School of Chemistry, The University of Sydney, NSW 2006, Australia*

<sup>‡</sup>*The Discipline of Pathology, Charles Perkins Centre, The University of Sydney, NSW 2006,  
Australia*

\*To whom correspondence should be addressed. Associate Professor Hugh Harris, *School of Chemistry and Physics, The University of Adelaide, SA 5005, Australia* Phone: 61-08-83135060; Facsimile: 61-8-83134358; Email: [hugh.harris@adelaide.edu.au](mailto:hugh.harris@adelaide.edu.au)

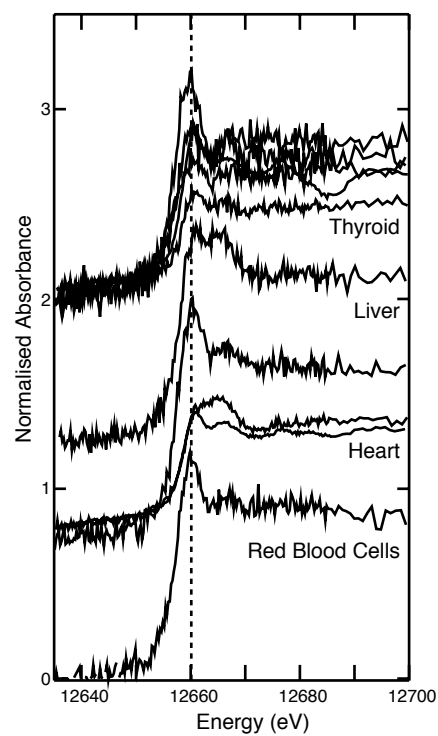

**Figure S1.** Se K-edge XANES spectra of thyroid, liver, heart and red blood cells from rats fed control, 1 ppm or 5 ppm Se (as selenite) diets for 3 weeks. These XANES spectra comprise the group circled in Figure 4. Note the difficulty encountered in normalising the spectra due to the low signal:noise ratios.

**Table S1.** Positions of the first peak of the Se *K*-edge XANES of model selenium compound spectra presented in Figure 2d, and selected tissue samples (3 week diets) presented in Figures 2a-c.

| Model or tissue sample          | Energy of first peak (eV) |
|---------------------------------|---------------------------|
| Se-Se-Se                        | 12659.7                   |
| S-Se-S                          | 12660.2                   |
| R-Se-Se-R                       | 12660.3                   |
| R-S-Se-R                        | 12660.6                   |
| R-Se-H                          | 12661.2                   |
| SeMet                           | 12661.1                   |
| MeSeCys                         | 12661.4                   |
| RSe <sup>-</sup>                | 12664.7                   |
| HSe <sup>-</sup>                | 12663.4                   |
| GPx                             | 12664.5                   |
| CuSe                            | 12664.0                   |
| R-Se-(O)-R                      | 12663.0                   |
| R-Se(O <sub>2</sub> )-R         | 12665.7                   |
| Me <sub>3</sub> Se <sup>+</sup> | 12662.6                   |
| SeO <sub>3</sub> <sup>2-</sup>  | 12664.0                   |
| kidney control                  | 12660.9                   |
| kidney 1 ppm                    | 12660.5                   |
| kidney 5 ppm                    | 12660.3                   |
| liver control                   | 12661.1                   |
| liver 1 ppm                     | 12660.9                   |
| liver 5 ppm                     | 12661.1                   |
| heart 5 ppm                     | 12660.7                   |
| red blood cells 5 ppm           | 12660.7                   |

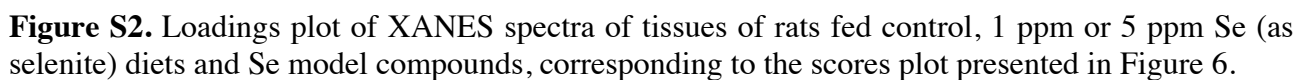

**Figure S2.** Loadings plot of XANES spectra of tissues of rats fed control, 1 ppm or 5 ppm Se (as selenite) diets and Se model compounds, corresponding to the scores plot presented in Figure 6.
